# Supplementary material for: Replacing Fish Meal with Defatted Insect Meal (Yellow Mealworm Tenebrio molitor) Improves the Growth and Immunity of Pacific White Shrimp (Litopenaeus vannamei)
Source: PubMed Central journal article supplement (PMC6563494; doi:10.3390/ani9050258), 2019-05-21

## Supplementary Materials: Replacing fish meal with defatted insect meal (yellow mealworm *Tenebrio molitor*) improves the growth and immunity of Pacific white shrimp (*Litopenaeus vannamei*)

**Table S1.** Insect meal of defatted yellow protein; hydrosoluble part and distribution size of protein of the hydrosoluble part.

| Size (kDa)        | Percentage (%) |
|-------------------|----------------|
| Soluble protein   | 20,02          |
| <0,555            | 68,54          |
| 1,4–0,555         | 4,45           |
| 6,5–1,4           | 5,89           |
| 12,4–6,5          | 11,56          |
| >12,4             | 9,57           |
| insoluble protein | 79,98          |

**Table S2.** Nucleotide composition of Insect meal.

| Nucleotide               | Insect defatted meal (g/kg) |
|--------------------------|-----------------------------|
| Cytosine                 | 0,025                       |
| Cytidine                 | 0,185                       |
| Uracyl                   | 0,013                       |
| Guanine                  | 0,1                         |
| Uridine                  | 0,478                       |
| Hypoxanthine             | 0                           |
| Adenine                  | 0,165                       |
| Guanosine                | 0                           |
| Adenosine                | 1,467                       |
| Inosine                  | 0                           |
| Cytidine Mono-Phosphate  | 0                           |
| Uridine Mono-Phosphate   | 0,23                        |
| Guanosine Mono-Phosphate | 0,037                       |
| Inosine Mono-Phosphate   | 0,04                        |
| Adenosine Mono-Phosphate | 0,175                       |
| <b>TOTAL</b>             | <b>2,915</b>                |

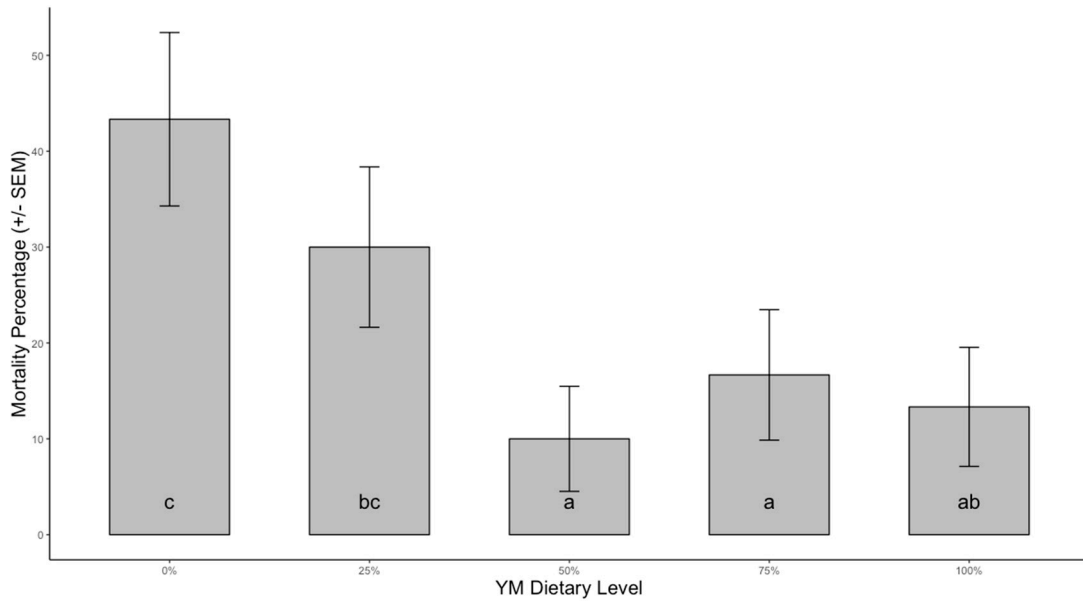

**Figure S1:** Comparison of cumulative mortality (%) per dietary treatment 10 days after the bacterial challenge ( $n = 30$ ). Different letters show significant differences between dietary groups.

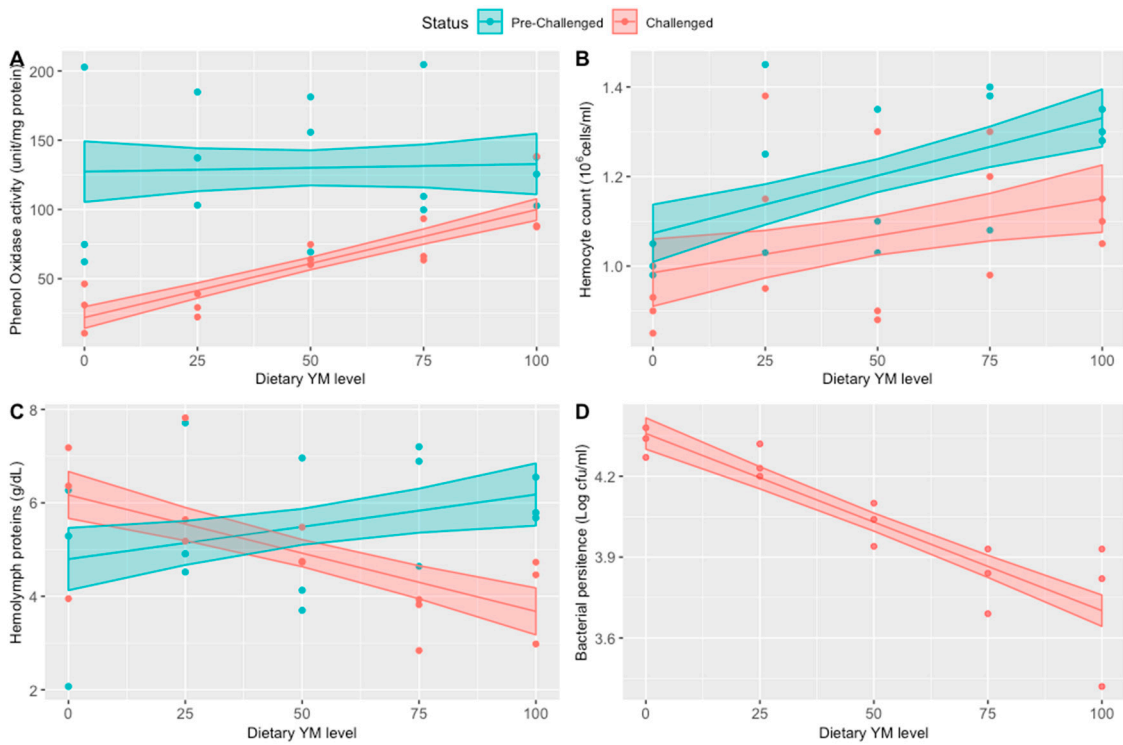

**Figure S2.** Immune status of the shrimp before and after bacterial challenge with PO expressed as units/mg of protein. (A) Phenoloxidase (B) hemocyte counts (C) hemolymph protein (D) persistent bacterial numbers in hemolymph 3h after the bacterial challenge. Confidence bands for each fitted line correspond to one SEM ( $n = 3$ ).

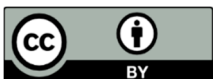

Supplement: animals-09-00258-s001.pdf [file animals-09-00258-s001.pdf]
